# Supplementary material for: Blockade of 6-phosphogluconate dehydrogenase generates CD8+ effector T cells with enhanced anti-tumor function
Source: PubMed Central journal article supplement — Cell Rep. Author manuscript; Available in PMC 2021 Apr 16. (PMC8051863; doi:10.1016/j.celrep.2021.108831), 2021-03-09
Supplement: NIHMS1683105-supplement-1.pdf [file NIHMS1683105-supplement-1.pdf]

**Cell Reports, Volume 34**

**Supplemental information**

**Blockade of 6-phosphogluconate dehydrogenase**

**generates CD8<sup>+</sup> effector T cells**

**with enhanced anti-tumor function**

**Saeed Daneshmandi, Teresa Cassel, Penghui Lin, Richard M. Higashi, Gerburg M. Wulf, Vassiliki A. Boussiotis, Teresa W.-M. Fan, and Pankaj Seth**

## Supplemental Information:

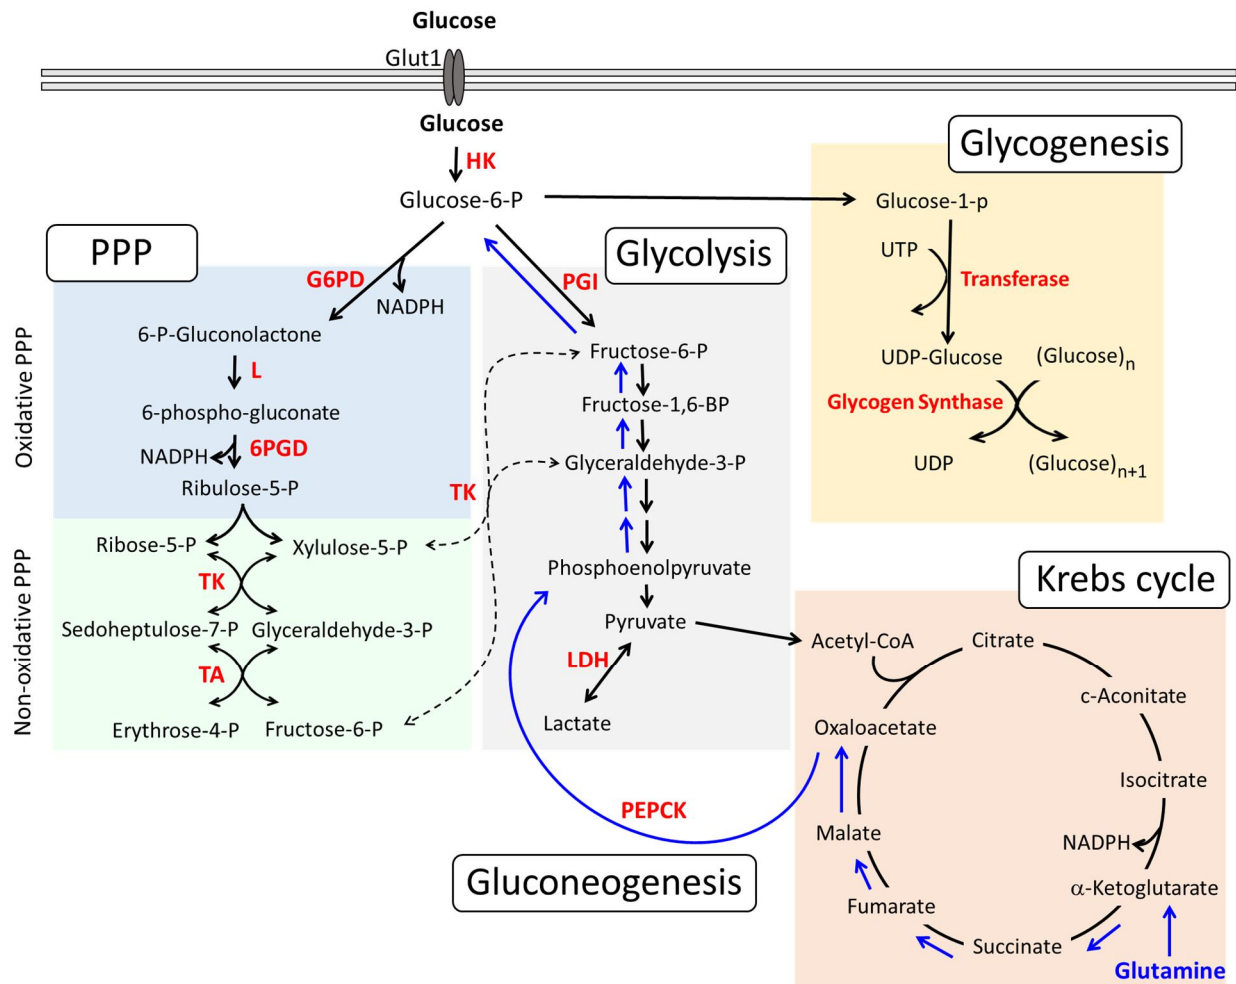

**Figure S1: Schematic diagram interconnecting PPP, glycolysis, gluconeogenesis, glycogenesis, and the Krebs cycle. Related to Figure 1 and 5.** After transported into the cell, glucose is converted to glucose-6-phosphate (glucose-6-P) by the enzyme hexokinase (HK). Subsequently, glucose-6-P can be catabolized in glycolysis, directed to PPP to generate ribose-5-phosphate (ribose-5-P) and NADPH for anabolic and anti-oxidation metabolism, and converted to glucose-1-phosphate (glucose-1-P) to fuel glycogen synthesis. The product of glycolysis, pyruvate, is fed into the Krebs cycle for further oxidation. Glutamine is fed into the Krebs cycle via  $\alpha$ -ketoglutarate, which can fuel gluconeogenesis as shown by the blue arrows. HK: Hexokinase; G6PD: Glucose-6-phosphate Dehydrogenase; L: Lactonase; 6PGD: 6-phosphogluconate Dehydrogenase; TK: Transketolase; TA: Transaldolase; PGI: Phosphoglucose Isomerase; LDH: Lactate Dehydrogenase; PEPCK: Phosphoenolpyruvate carboxykinase.

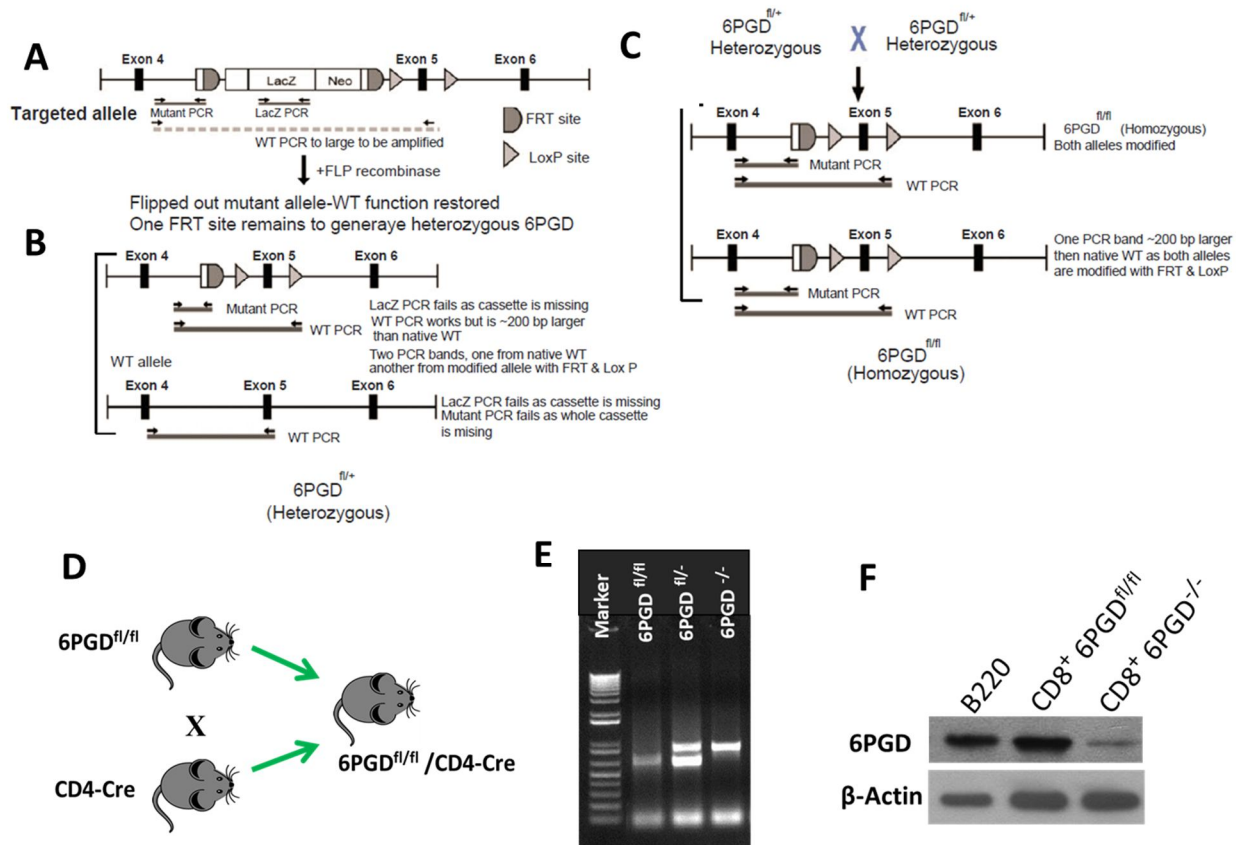

**Figure S2: Generation of 6PGD<sup>fl/fl</sup>CD4<sup>cre</sup> (6PGD<sup>-/-</sup>) mice. Related to Figure 1. (A)** Schematic representation of a targeted allele: The targeting strategy leads to the insertion of the SA-βgeo-pA cassette into the intron between exons 4 and 5 of 6PGD, which disrupts gene function, and reports the expression of the targeted gene. The targeted 6PGD exon 5 is flanked by loxP sites. (Key: FRT, target site for FLP recombinase; loxP, target site for Cre-recombinase; SA, splice acceptor; βgeo, β-galactosidase/neomycin phosphotransferase fusion gene; pA, polyadenylation sequence). **(B)** Conditional allele after excision of the SA-βgeo-pA cassette by FLP recombinase deleted mouse strain referred to as 6PGD<sup>fl/+</sup> since it represents heterozygous status of modified 6PGD allele. **(C)** Heterozygous mice were crossed to generate homozygous 6PGD<sup>fl/fl</sup>. **(D)** 6PGD<sup>fl/fl</sup> mice were crossed with mice carrying Cre recombinase under the control of the CD4 promoter (CD4-Cre) to generate 6PGD<sup>fl/fl</sup>/CD4-Cre. **(E)** PCR validation of the 6PGD<sup>fl/fl</sup>/CD4-Cre and 6PGD<sup>fl/fl</sup>/CD4-Cre mice. **(F)** Western blot analysis CD8<sup>+</sup> T cells from 6PGD<sup>fl/fl</sup>/CD4-Cre (6PGD<sup>-/-</sup>) and 6PGD<sup>fl/fl</sup> mice.

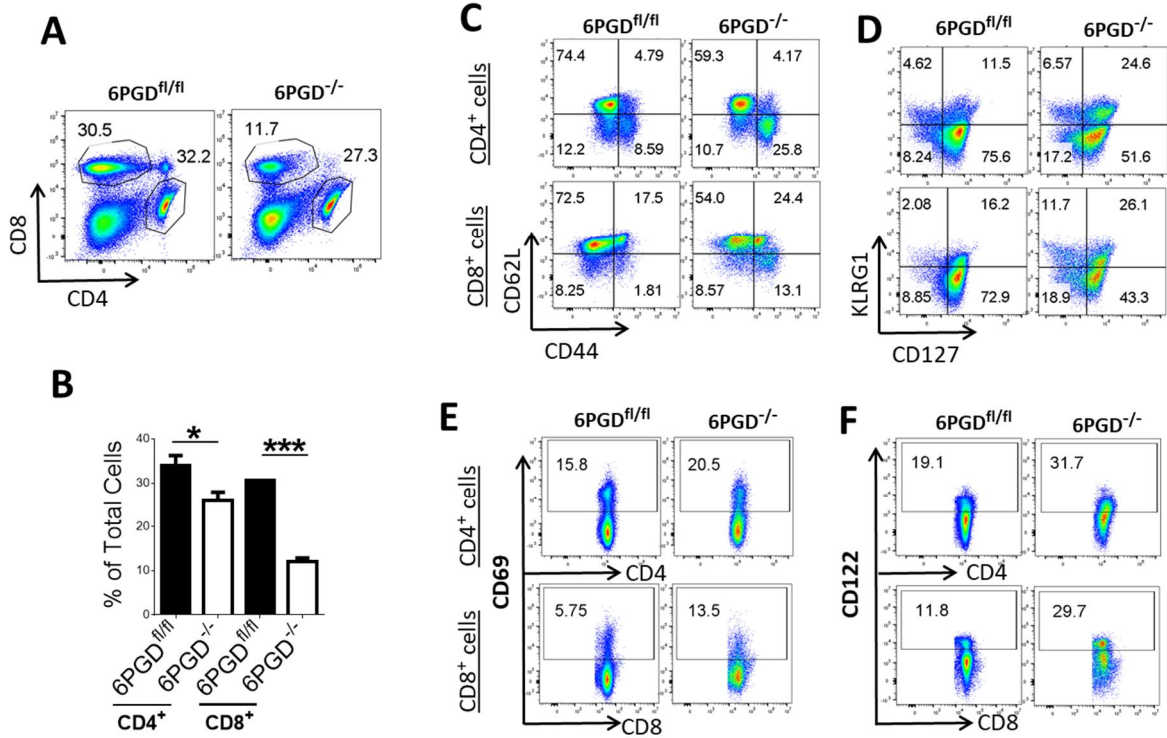

**Figure S3: CD4<sup>+</sup> and CD8<sup>+</sup> T cells in the lymph nodes of 6PGD<sup>-/-</sup> mice display an activated phenotype. Related to Figure 1. (A-B)** Lymph node cells were collected from 6PGD<sup>-/-</sup> and 6PGD<sup>fl/fl</sup> mice and CD4<sup>+</sup> and CD8<sup>+</sup> T cells were assessed by flow cytometry (**A**). Representative dot plots (**A**) and average values of three independent experiments (**B**) are shown. **(C-D)** Lymph node cells were collected from 6PGD<sup>fl/fl</sup> and 6PGD<sup>-/-</sup> mice and expression of the indicated combination of markers (CD44/CD62L and KLRG1/CD127) was assessed by flow cytometry to identify naïve (CD62L<sup>high</sup> CD44<sup>low</sup>), effector (CD62L<sup>low</sup> CD44<sup>high</sup>) and memory (CD62L<sup>high</sup> CD44<sup>high</sup>) cells on gated CD4<sup>+</sup> and CD8<sup>+</sup> populations. Representative dot plots are shown. Results are representative of two independent experiments. **(E-F)** Lymph nodes were collected from 6PGD<sup>-/-</sup> and 6PGD<sup>fl/fl</sup> mice and expression of CD69 and CD122 on gated CD4<sup>+</sup> and CD8<sup>+</sup> T cells was assessed by flow cytometry. Representative dot plots are shown. Results are representative of two independent experiments. Error bars represent  $\pm$  SEM. \*:  $p < 0.05$ ; \*\*\*:  $p < 0.001$ .

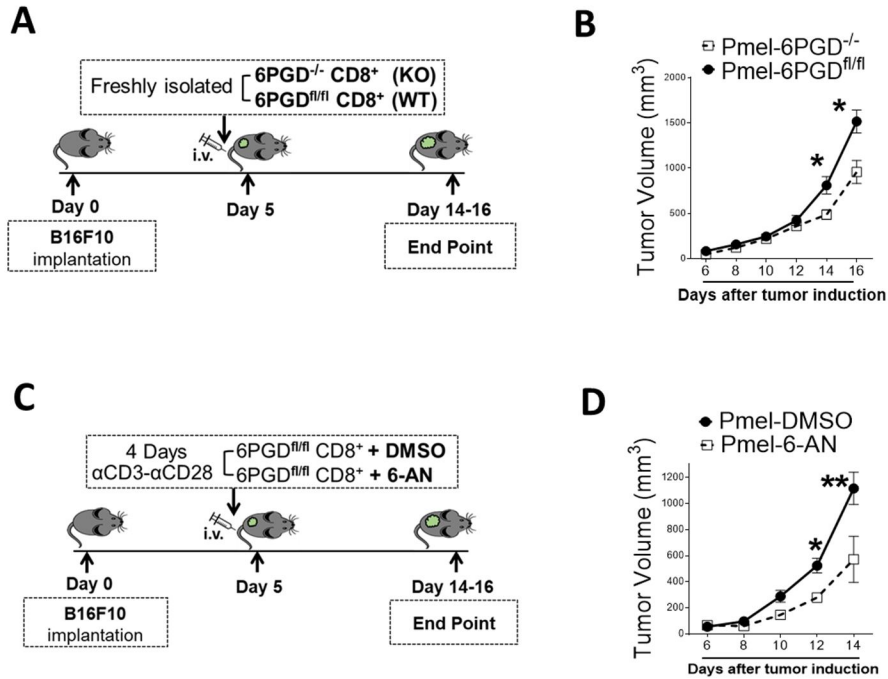

**Figure S4: Genetic ablation or pharmacologic inhibition of 6PGD induces CD8<sup>+</sup> T cells with enhanced effector function against pmel B16-F10 tumor in vivo. Related to Figure 3. (A-B)** CD8<sup>+</sup> T cells from pmel/6PGD<sup>-/-</sup> and pmel/6PGD<sup>fl/fl</sup> mice were cultured with αCD3+αCD28 mAbs-plus-IL-2 (20 IU/ml) for 4 days and were subsequently adoptively transferred to congenic mice (CD45.1<sup>+</sup>) bearing B16F10 melanoma tumors (A). Tumor size was measured every 48 hours and tumor volume was calculated (B). Results are representative of two independent experiments with n=9 mice per group. (C-D) CD8<sup>+</sup> T cells were isolated from pmel/6PGD<sup>fl/fl</sup> mice and were stimulated in vitro with αCD3+αCD28 mAbs-plus-IL-2 (20 IU/ml) for 4 days in the presence of 6-AN or vehicle control (DMSO). Cells were subsequently adoptively transferred to congenic mice (CD45.1<sup>+</sup>) bearing B16F10 melanoma tumors. (C) Tumor growth was evaluated by measuring size every 2 days and tumor volume was calculated. Results are representative of two independent experiments with n=10 mice per group. Error bars represent ± SEM. \*: p <0.05; \*\*: p <0.01.

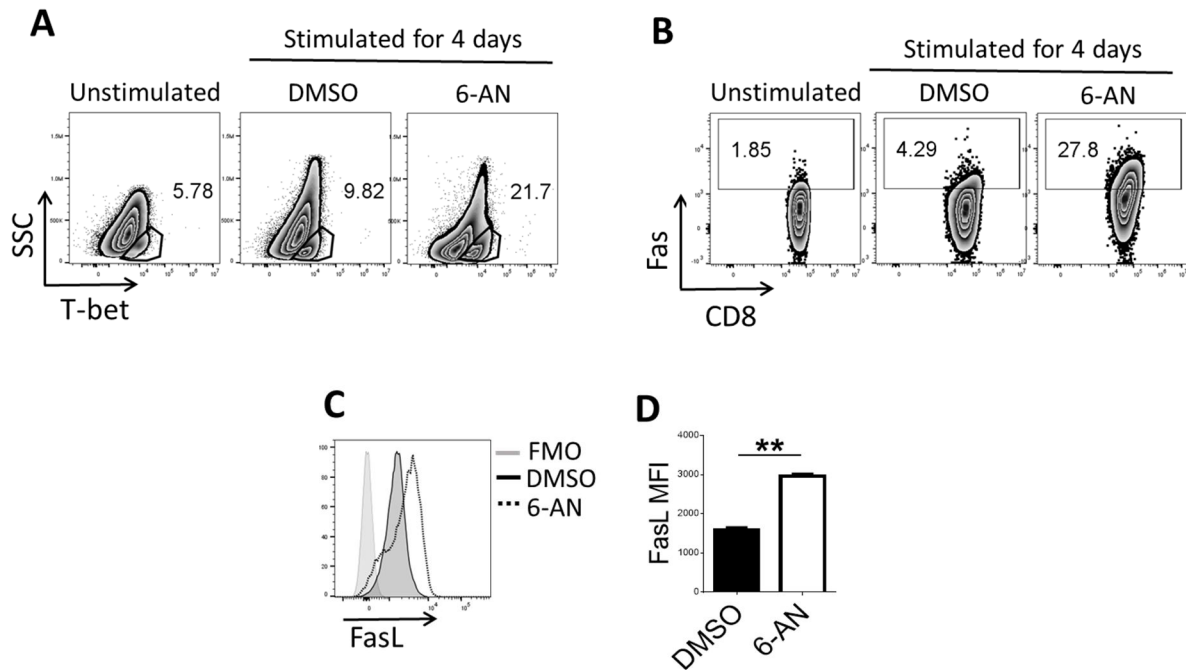

**Figure S5: Effect of 6-AN on naïve CD8<sup>+</sup> T cells stimulated in vitro. Related to Figure 4. (A-D)** Naïve CD8<sup>+</sup> T cells were isolated from C57BL/6 WT mice and were cultured in vitro in the presence of  $\alpha$ CD3+ $\alpha$ CD28 mAbs and IL-2 for 4 days in the presence of 6-AN (10  $\mu$ M) or vehicle control (DMSO). Expression of T-bet (A), Fas (B) and FasL (C, D) was determined by flow cytometry. Results are representative of three independent experiments with n=4 per experiment. Error bars represent  $\pm$  SEM. \*\*: p < 0.01.

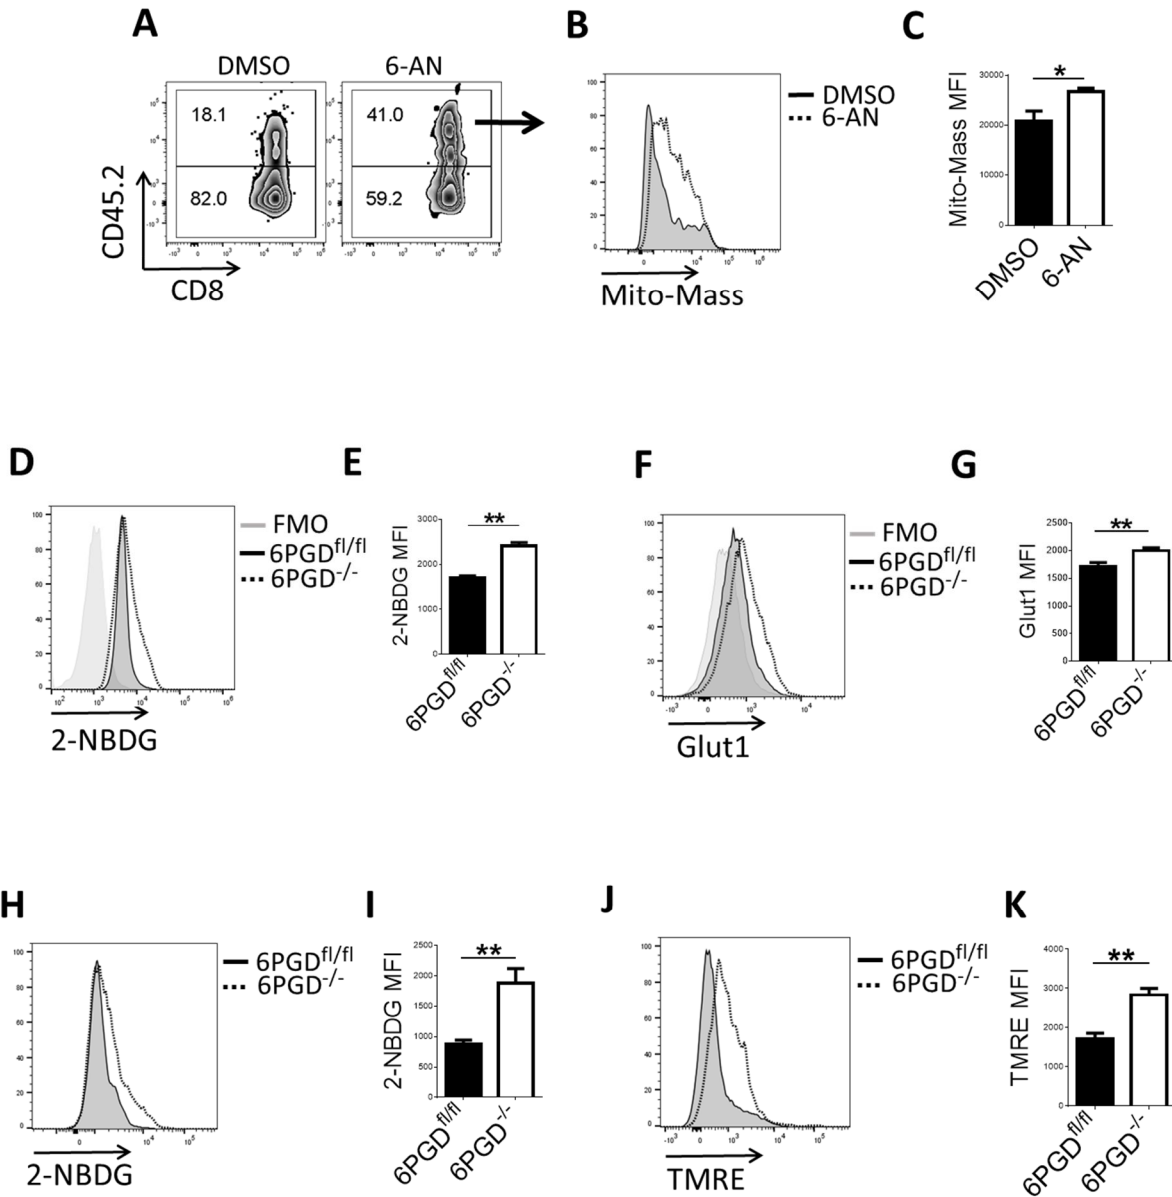

**Figure S6: CD8<sup>+</sup> T cells metabolic characteristics. Related to Figure 3 and 5. (A-C)** Infiltration and mitochondrial status of adoptively transferred naïve CD8<sup>+</sup> 6PGD<sup>fl/fl</sup> pmel<sup>+</sup> cells treated with 6-AN. **(A)** Fractions of adoptively transferred T cells (CD45.2<sup>+</sup>) in TILs 10 days after adoptive transfer of 6PGD<sup>fl/fl</sup> pmel<sup>+</sup> CD8<sup>+</sup> cells were cultured with  $\alpha$ CD3+ $\alpha$ CD28 mAbs plus-IL-2 for 4 days in the presence of 6-AN or vehicle control (DMSO) and were subsequently transferred to (CD45.1<sup>+</sup>) congenic mice. Fractions of in vitro-treated CD45.2<sup>+</sup> T cells in TILs was assessed 10 days after adoptive transfer. **(B-C)** Histograms and bar graph representative of mitochondrial mass (MFI) for CD45.2<sup>+</sup> infiltrated TILs on day 10 post adoptive transfer of 6-AN or DMSO pre-treated CD8<sup>+</sup> T cells. Results are representative of two independent experiments with n=6 mice per group. **(D-G)** Glucose uptake by CD8<sup>+</sup> T cells from 6PGD<sup>-/-</sup> and 6PGD<sup>fl/fl</sup> mice. **(D-F)** Splenic CD8<sup>+</sup> T cells

from 6PGD<sup>-/-</sup> and 6PGD<sup>fl/fl</sup> mice were isolated and expression of Glut1 on their surface is shown as histogram and MFI bar graph. **(F-G)** Glucose uptake capacity was examined by uptake of 2-NBDG on CD8<sup>+</sup> T cells from 6PGD<sup>-/-</sup> and 6PGD<sup>fl/fl</sup> mice. Results are representative of two independent experiments with n=3 per experiment. **(H-K)** Glucose uptake and mitochondrial membrane potential of pmel/6PGD<sup>fl/fl</sup> and 6PGD<sup>-/-</sup> CD8<sup>+</sup> T cells as co-culture with B16 melanoma tumor cells in vitro. **(H-I)** pmel/6PGD<sup>fl/fl</sup> and pmel/6PGD<sup>-/-</sup> CD8<sup>+</sup> T cells were co-cultured for 20 hr with B16-F10 melanoma cells, media was washed away, and the co-culture was exposed to low concentration of 2-NBDG. The results are shown as histogram and calculated MFI for CD8<sup>+</sup> T cells. **(J-K)** Similarly, mitochondrial membrane potential was assessed by TMRE fluorescence and results are shown as histoplot and MFI bar graph. Results are representative of two independent experiments with n=4 per experiment. Glut1: Glucose transporter 1; 2-NBDG: 2-deoxy-2-[(7-nitro-2,1,3-benzoxadiazol-4-yl)amino]-D-glucose. Error bars represent  $\pm$  SEM. \*: p <0.05; \*\*: p <0.01.



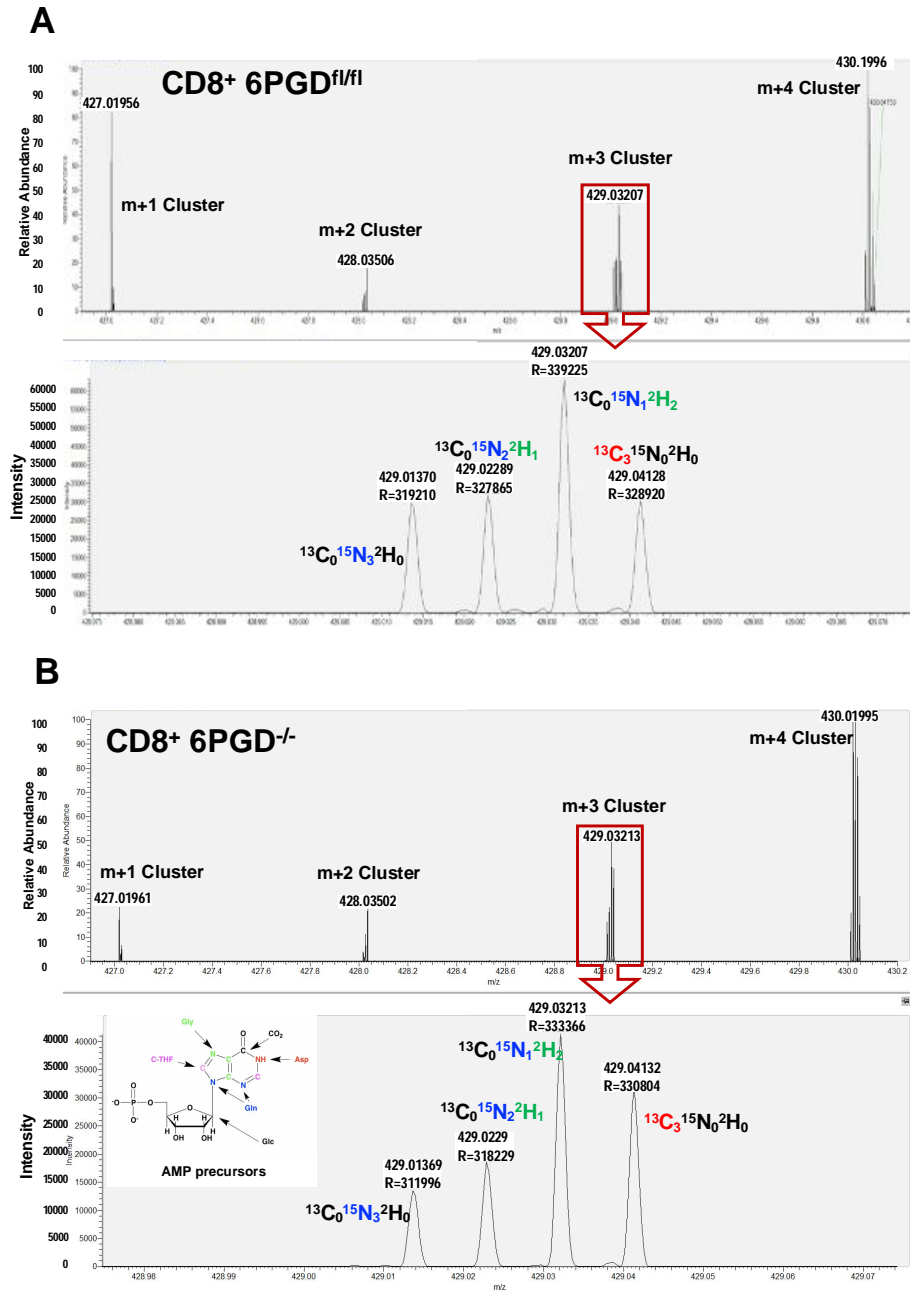

**Figure S7: UHRMS<sup>1</sup> resolution of simultaneous <sup>13</sup>C, <sup>15</sup>N, and <sup>2</sup>H in isotopologues of ATP with the same nominal m/z of 429.0x. Related to Figure 5. Top panels show the first four isotopic enrichment clusters of UHRMS<sup>1</sup> spectra of ATP from IC-UHRMS<sup>1</sup> runs of one each CD8<sup>+</sup> T cells with wildtype (6PGD<sup>fl/fl</sup>, **A**) and 6PGD knockout (6PGD<sup>-/-</sup>, **B**), both in D<sub>7</sub>-Glc + <sup>13</sup>C<sub>5</sub>, <sup>15</sup>N<sub>2</sub>-Gln dual tracer, triple-isotopic label experiments. The bottom panels show the expanded spectra of 4 ATP isotopologues with the same nominal m/z of 429.0x, which is ~3 m/z higher (m+3 cluster) than that of the <sup>12</sup>C, <sup>14</sup>N, <sup>1</sup>H-isotopologue (monoisotopic cluster). They were fully baseline resolved and assigned to <sup>13</sup>C<sub>0</sub><sup>15</sup>N<sub>3</sub><sup>2</sup>H<sub>0</sub>, <sup>13</sup>C<sub>0</sub><sup>15</sup>N<sub>2</sub><sup>2</sup>H<sub>1</sub>, <sup>13</sup>C<sub>0</sub><sup>15</sup>N<sub>1</sub><sup>2</sup>H<sub>2</sub>, and <sup>13</sup>C<sub>3</sub><sup>15</sup>N<sub>0</sub><sup>2</sup>H<sub>0</sub>, based on the IC retention time and the exact mass of ATP with a loss of phosphate, which were confirmed by a parallel ATP standard run. **R** refers to the mass resolution achieved with each isotopologue; the exact m/z's**

shown are raw values prior to post-run m/z correction. Also shown in **B** is a diagram illustrating carbon and nitrogen origin of AMP (same origins as for ATP), i.e. the ribosyl unit from glucose (Glc), three carbons of adenine ring from Gly and formyl-tetrahydrofolate (C-THF), two nitrogens from Gln, and one nitrogen from Asp. The abundance of  $^{13}\text{C}_3$ -ATP indicates its synthesis from  $^{13}\text{C}_5,^{15}\text{N}_2$ -Gln via Gly, C-THF, and/or ribose, all of which are produced via gluconeogenesis (GNG). The relatively higher enrichment of  $^{13}\text{C}_3$ -ATP in  $6\text{PGD}^{-/-}$  versus WT cells is consistent with enhanced fueling of ATP synthesis via GNG in  $6\text{PGD}^{-/-}$  cells.

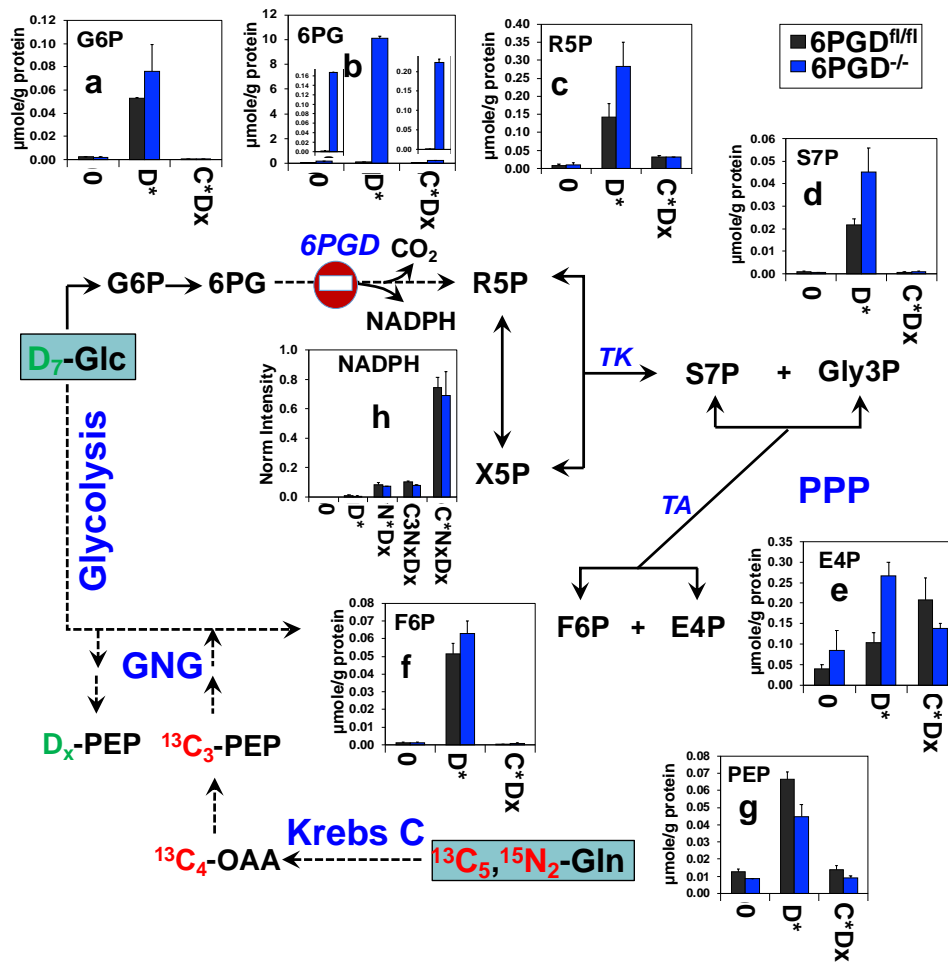

**Figure S8: 6PGD<sup>-/-</sup> ablation results in enhanced non-oxidative PPP and diversion of gluconeogenic carbons to PPP. Related to Figure 5.** The cell extracts (n=2) in Figure 5 were analyzed by IC-UHRMS as μmole/g protein. Legend in X-axis: 0 = unlabeled; Dx = sum of D<sub>1</sub> to D<sub>x</sub> or Glc-derived species; C<sup>\*</sup>Dx = sum of <sup>13</sup>C labeled species with 0-x number of D; N<sup>\*</sup>Dx = sum of <sup>15</sup>N labeled species with 0-x number of D; C<sub>3</sub>N<sub>x</sub>Dx = sum of <sup>13</sup>C<sub>3</sub> with 0-x number of D and <sup>15</sup>N, which could reflect incorporation of GNG product into the ribose unit of NADPH; C<sup>\*</sup>N<sub>x</sub>Dx = sum of <sup>13</sup>C labeled species with 0-x number of <sup>15</sup>N and D. G6P, glucose-6-phosphate; 6-PG, 6-phosphogluconate; R5P, ribose-5-phosphate; S7P, sedoheptulose-7-phosphate; Gly3P, glyceraldehyde-3-phosphate; X5P, xylulose-5-phosphate; E4P, erythrose-4-phosphate; F6P, fructose-6-phosphate. Error bars represent ± SEM.

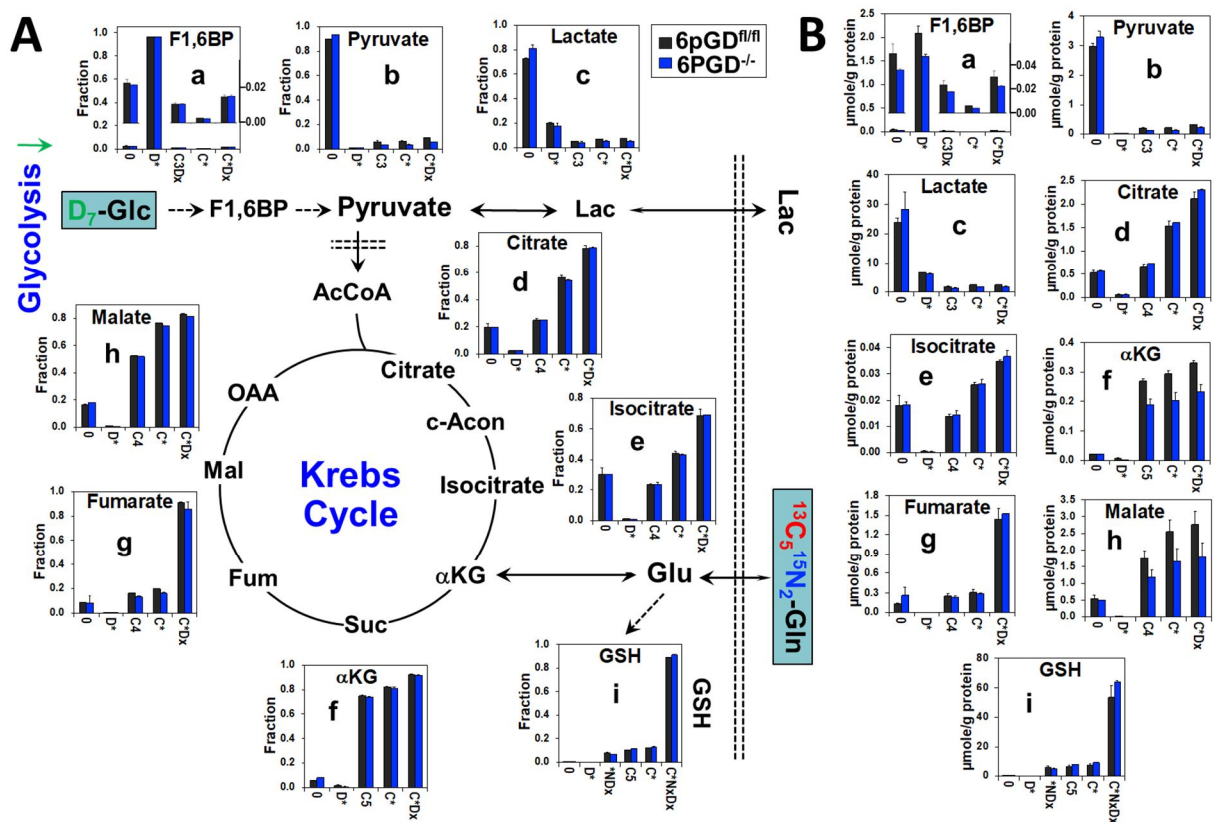

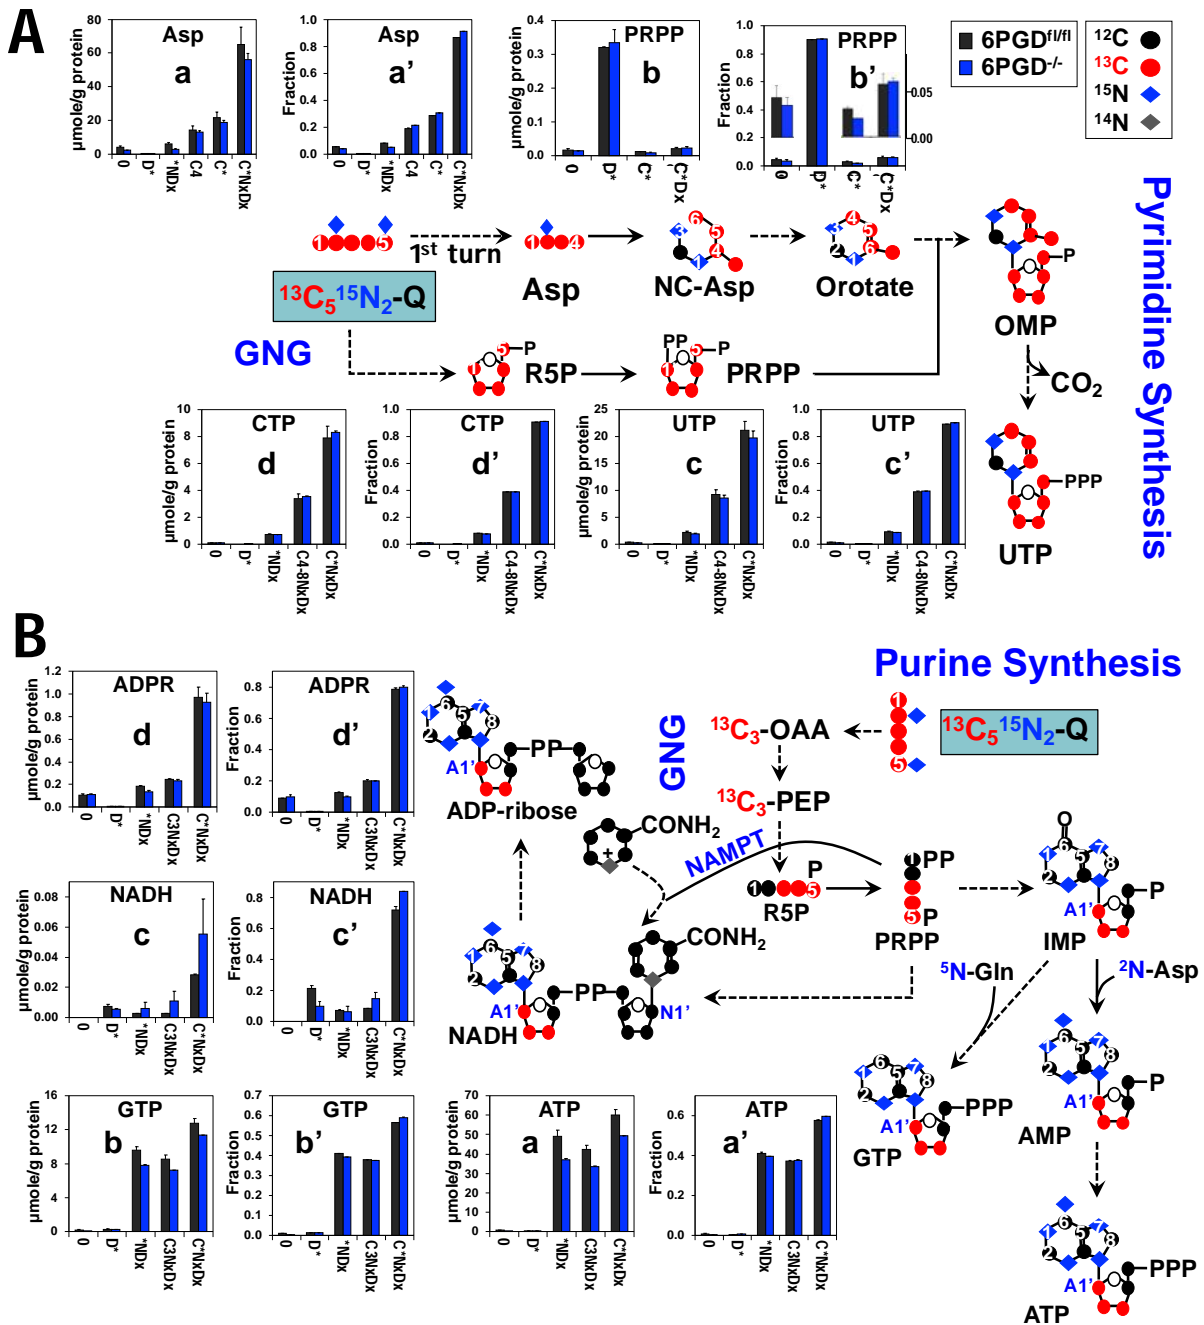

**Figure S10: Nucleotide biosynthesis is sustained in 6PGD deficient CD8<sup>+</sup> T cells. Related to Figure 5.** The same polar extracts from Figure 5 were analyzed for nucleotides and related metabolites by IC-UHRMS. Shown in **A** and **B** are changes in the levels (**a-d**) and fractional enrichment (**a'-d'**) of selected intermediates and products of the pyrimidine and purine nucleotide/dinucleotide synthesis pathways, respectively. Also shown is the <sup>13</sup>C and <sup>15</sup>N tracing from the Gln tracer to pyrimidine and purine nucleotides via GNG and the nucleotide synthesis pathways. Not all labeled species are shown. Comparing 6PGD<sup>fl/fl</sup> and 6PGD<sup>-/-</sup> CD8<sup>+</sup> T cells, there was no significant attenuation in the incorporation of D, <sup>13</sup>C, and/or <sup>15</sup>N into pyrimidine nucleotide metabolites (**A**). This was also the case for purine nucleotides and dinucleotides (**B**). Labels in

X-axis describe the same series of mass isotopologues as in **Figure 5**. In addition, C4-8NxDx (sum of  $^{13}\text{C}_{4-8}$  species with 0-x number of  $^{15}\text{N}$  and D) in **A** reflects  $^{13}\text{C}$  incorporation into the ribose unit of UTP and CTP via GNG since the maximal number of  $^{13}\text{C}$  in the pyrimidine ring is 3. Abbreviations used are: Asp, aspartate; PRPP, phosphoribosyl pyrophosphate; UTP: uridine triphosphate; CTP: cytidine triphosphate; IMP: inosine monophosphate; ADPR, ADP-ribose; NADH: nicotinamide adenine dinucleotide; GTP: guanosine triphosphate; ATP: adenosine triphosphate; GNG: gluconeogenesis. Error bars represent  $\pm$  SEM.

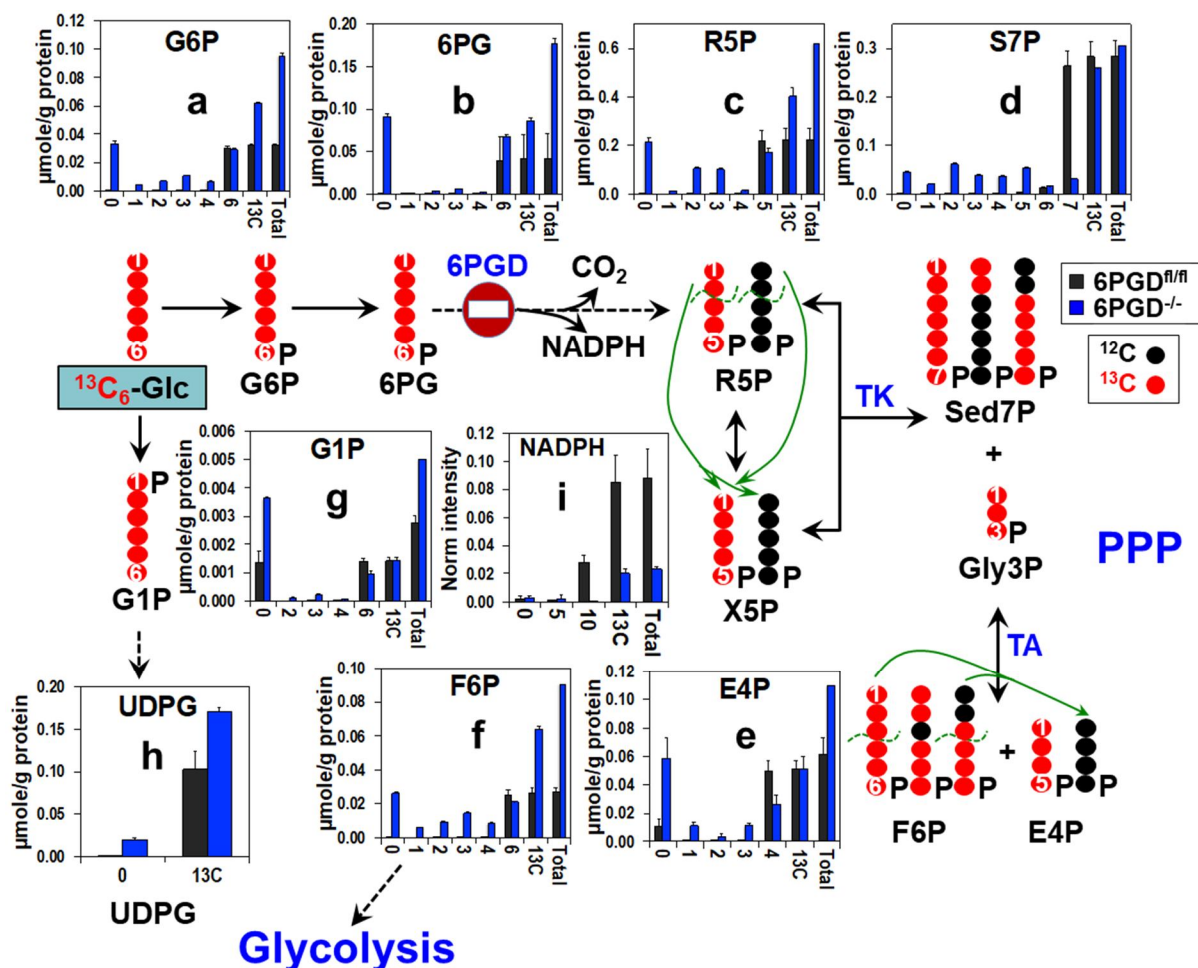

**Figure S11:  $^{13}\text{C}_6$ -glucose tracer study of unsorted  $6\text{PGD}^{-/-}$   $\text{CD8}^+$  T cells confirms the suppression of  $6\text{PGD}$  and activation of the non-oxidative PPP. Related to Figure 5.** Total  $\text{CD8}^+$  T cells were isolated from  $6\text{PGD}^{-/-}$  and  $6\text{PGD}^{\text{fl/fl}}$  mice and stimulated with  $\alpha\text{CD3}+\alpha\text{CD28}$  in the presence of  $^{13}\text{C}_6$ -Glc for 48 hrs. Isotope labeling patterns of metabolites of cell extracts were analyzed by IC-UHRMS. Diagram demonstrate the conversion of  $^{13}\text{C}_6$ -Glc into the metabolites of PPP and glycogen synthesis intermediates. Results are representative of two independent experiments. G6P, glucose-6-phosphate; 6-PG, 6-phosphogluconate; R5P, ribose-5-phosphate; S7P, sedoheptulose-7-phosphate; Gly3P, glyceraldehyde-3-phosphate; X5P, xylulose-5-phosphate; E4P, erythrose-4-phosphate; F6P, fructose-6-phosphate; G1P, glucose-1-phosphate; UDPG, Uridine diphosphate glucose. Error bars represent  $\pm$  SEM.

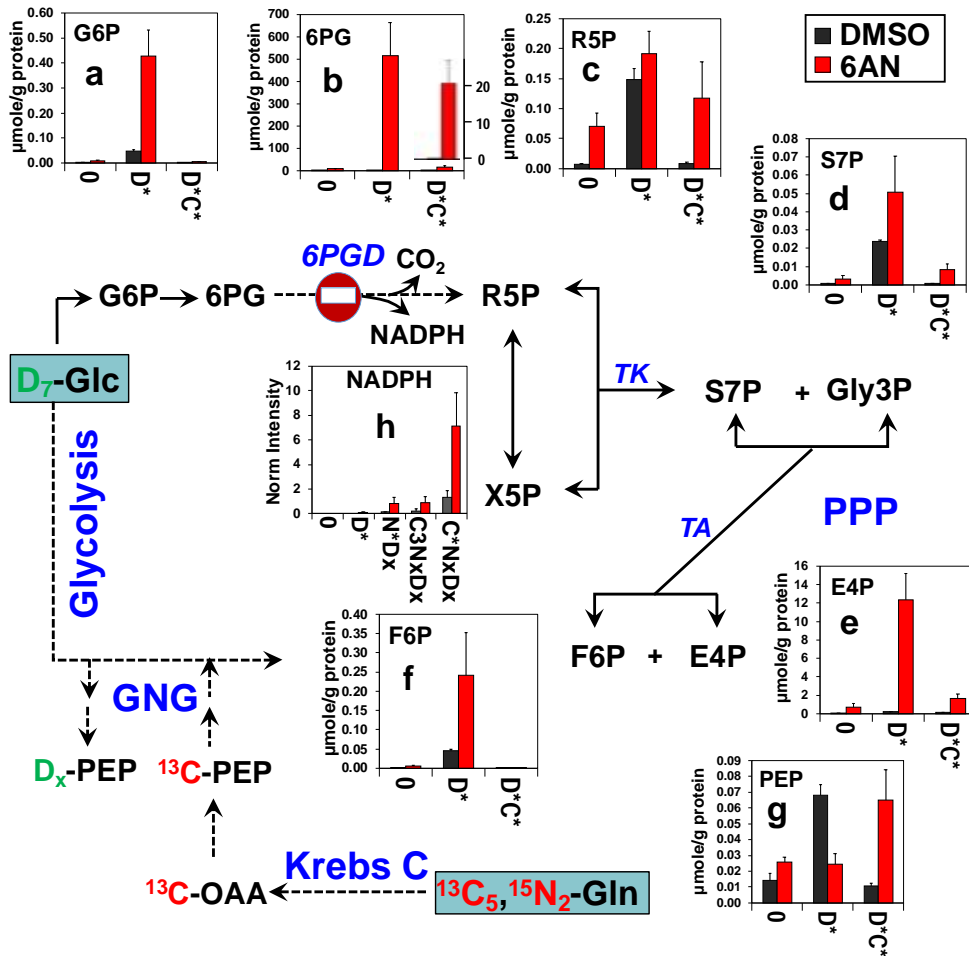

**Figure S12: 6PGD inhibition by 6-AN results in enhanced non-oxidative PPP and diversion of gluconeogenic carbons to PPP. Related to Figure 5.** The same batch of naïve CD8<sup>+</sup> T cells from Figure 5 were treated with 6-AN or the DMSO vehicle in the presence of dual  $D_7$ -Glc +  $^{13}C_5, ^{15}N_2$ -Gln tracers for 4 days. The polar extracts were analyzed by IC-UHRFTMS. indicates inhibition of 6PGD and activation of the non-oxidative PPP by 6-AN. All abbreviations are the same as in Figure 5. Error bars represent ± SEM.



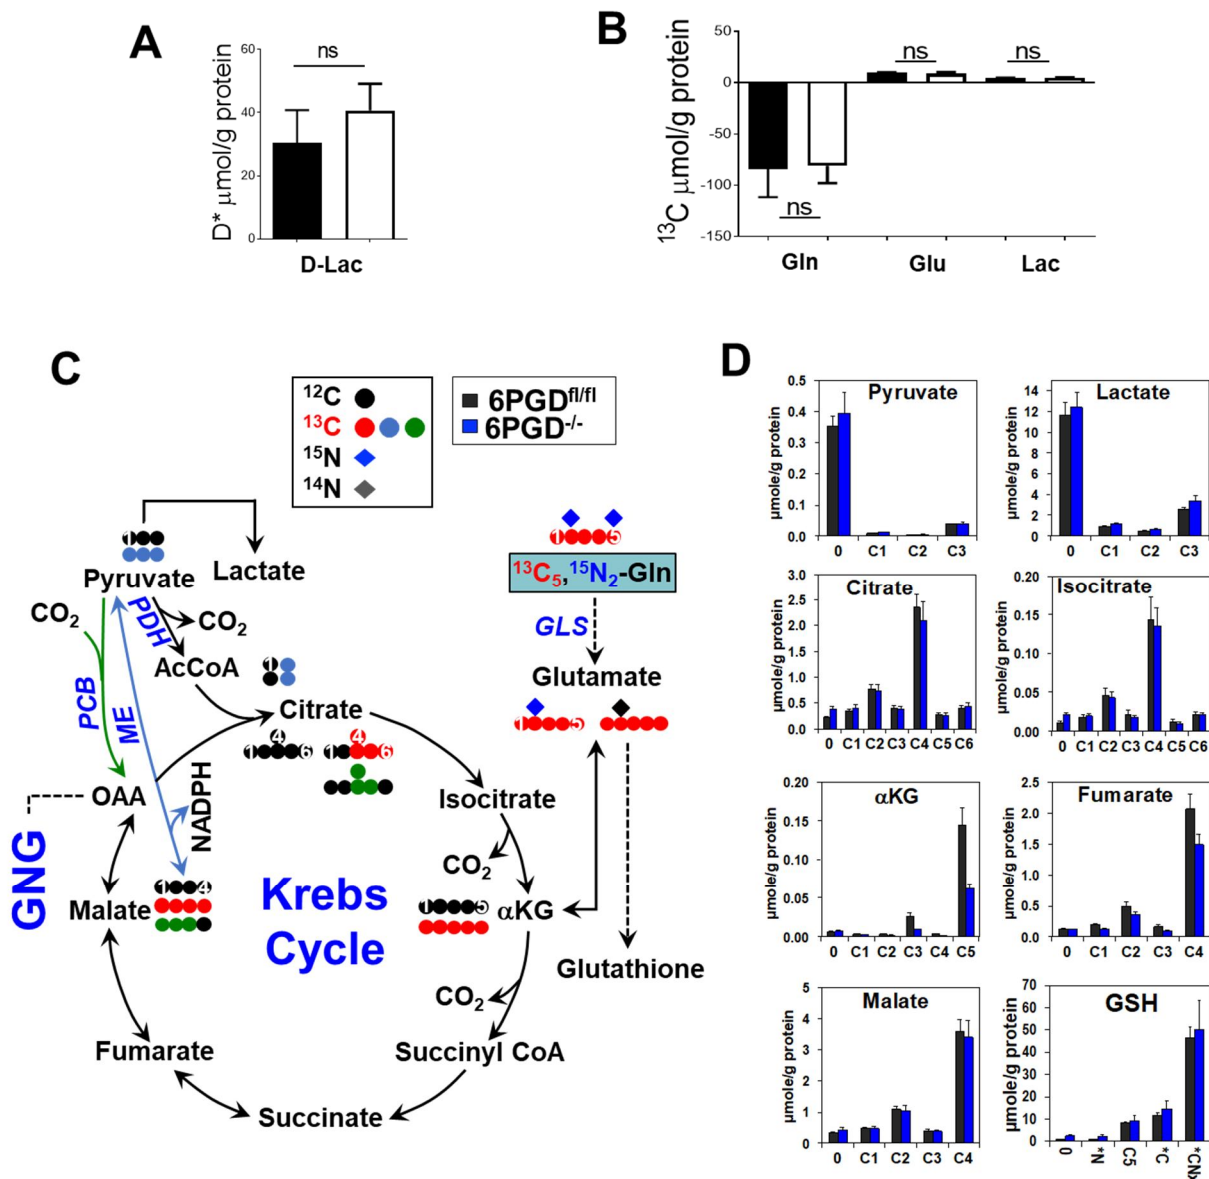

**Figure S13:**  $^{13}\text{C}_5, ^{15}\text{N}_2\text{-Gln}$  tracer study of  $6\text{PGD}^{-/-}$  ablation in unsorted  $\text{CD8}^+$  T cells shows comparable effect on the labeling patterns of metabolites as those from the dual  $\text{D}_7\text{-Glc} + ^{13}\text{C}_5, ^{15}\text{N}_2\text{-Gln}$  tracer study. Related to Figure 5. (A-B) Media culture from the same set of experiments in Figure 5 was analyzed by NMR. (A) Release of D labeled lactate showed a trend of increase in  $6\text{PGD}^{-/-}$   $\text{CD8}^+$  T cells but it was not statistically significant. (B) There was no significant changes in the consumption of the Gln tracer or the release of the  $^{13}\text{C}$ -Glu and -Lac products into the media. (C-D) Total  $\text{CD8}^+$  T cells were isolated from  $6\text{PGD}^{-/-}$  and  $6\text{PGD}^{\text{fl/fl}}$  mice and stimulated with  $\alpha\text{CD3} + \alpha\text{CD28}$  in the presence of  $^{13}\text{C}_5, ^{15}\text{N}_2\text{-Gln}$  for 48 hrs. Panel C traces the fate of  $^{13}\text{C}$  and  $^{15}\text{N}$  via the glutaminase (GLS) and the first Krebs cycle activities. Metabolites were analyzed by IC-UHRMS and shown as  $\mu\text{mole/g}$  protein data in D. Results are representative of two independent experiments. Lac: Lactate; Gln: Glutamine; Glu: Glutamate. PDH: pyruvate dehydrogenase; ME: malic enzyme; PCB: pyruvate carboxylase; GNG: gluconeogenesis; AcCoA, acetyl CoA;  $\alpha\text{KG}$ ,  $\alpha$ -ketoglutarate; OAA, oxaloacetate; GSH, glutathione. Error bars represent  $\pm$  SEM.

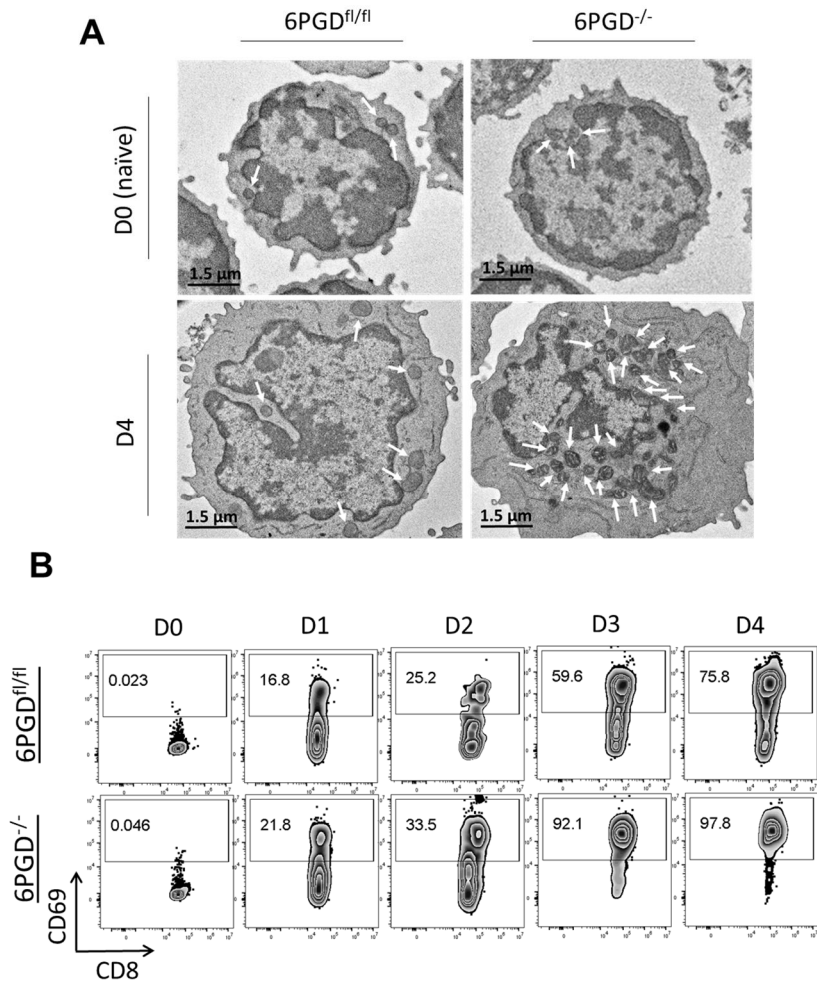

**Figure S14: 6PGD<sup>-/-</sup> CD8<sup>+</sup> T cells have higher mitochondria numbers and higher CD69 marker expression during activation. Related to Figure 6 and 7. (A)** Splenic naïve (CD62L<sup>high</sup> CD44<sup>low</sup>) CD8<sup>+</sup> T cells from 6PGD<sup>-/-</sup> and 6PGD<sup>fl/fl</sup> mice were isolated, stimulated with  $\alpha$ CD3+ $\alpha$ CD28 mAbs-plus-IL-2 (20 IU/ml) for 4 days and analyzed by at day 0 (naïve) and 4 days post stimulation by electron microscopy (EM). Representative images of mitochondria number per cell are shown. Scale bars are mentioned in the figures. **(B)** Naïve CD8<sup>+</sup> T cells from 6PGD<sup>-/-</sup> and 6PGD<sup>fl/fl</sup> mice were stimulated for 4 days with  $\alpha$ CD3+ $\alpha$ CD28 mAbs-plus-IL-2 (20 IU/ml) and expression of CD69 was examined by flow cytometry. Results are representative of two independent experiments with n=3 per experiment.
